# Supplementary material
Source: ML conference proceedings conference paper supplement (https://proceedings.neurips.cc/paper_files/paper/2022/hash/eb890c36af87e4ca82e8ef7bcba6a284-Abstract.html)
Supplement: Supplementary file 1 [file eb890c36af87e4ca82e8ef7bcba6a284-Supplemental-Conference.pdf]

---

# Supplementary Materials of Decoupling Features in Hierarchical Propagation for Video Object Segmentation

---

Zongxin Yang<sup>1,2</sup>, Yi Yang<sup>1</sup>

<sup>1</sup> CCAI, College of Computer Science and Technology, Zhejiang University <sup>2</sup> Baidu Research  
{yangzongxin, yangyics}@zju.edu.cn

## A Appendix

### A.1 More Training Details

Following [3, 13, 16, 19, 24, 28], we first pre-train DeAOT on synthetic video sequence generated from static image datasets [4, 6, 7, 11, 21] by randomly applying multiple image augmentations [24]. Then, we do main training on the VOS benchmarks [18, 25] by randomly applying video augmentations [3, 27, 28].

The optimization strategies and related hyper-parameters are also the same as AOT. In detail, we adopt the AdamW [12] optimizer and the sequential training strategy [27] with a sequence length of 5. The loss function is a 0.5:0.5 combination of BCE loss [22] and soft Jaccard loss [15]. For pre-training, we use an initial learning rate of  $4 \times 10^{-4}$  and a weight decay of 0.03. For main training, the initial learning rate is set to  $2 \times 10^{-4}$ , and the weight decay is 0.07. Each training stage takes 100,000 steps, and the batch size is 16. We used 4/1 Tesla V100 GPU for training/testing.

### A.2 Inference Details on VOT 2020

Most of the inference details on VOT 2020 [9] are the same as the inference setting of AOT [28] on YouTube-VOS [25] and DAVIS [17, 18]. The differences are listed below: (1) The size of input videos is resized to be smaller than  $1.3 \times 480p$  and larger than 480p, since some VOT-2020 videos are smaller than 480p, which is too small to extract object features effectively. (2) We update the long-term memory DeAOT/AOT per 10 frames instead of 5 frames, and we will drop the oldest frame (except for the reference frame) from the long-term memory if the memory size is larger than 10 frames. In other words, the maximum temporal range of long-term memory is  $10 \times 10 = 100$  frames. Such a process is necessary to keep enough long-term information and avoid facing out of memory when inferring long videos. The longest video in VOT 2020 contains 1,500 frames. (3) When processing tiny objects smaller than 1/900 of the video size. We conduct video object segmentation only in a small cropped window, which is dynamically centered at the object's position in the last frame where the object is not occluded. The size of cropped window is only 1/12 of the input resolution, and the cropped image will be resized to  $465 \times 465$ . By doing this, we can further save computations in the inference stage and will not lose performance since tiny objects always move slowly.

### A.3 Compare with More VOS Methods

We compare our DeAOT with more VOS methods in Table 2 and 1. As shown, DeAOT variant networks outperform all the competitors in both performance and efficiency.

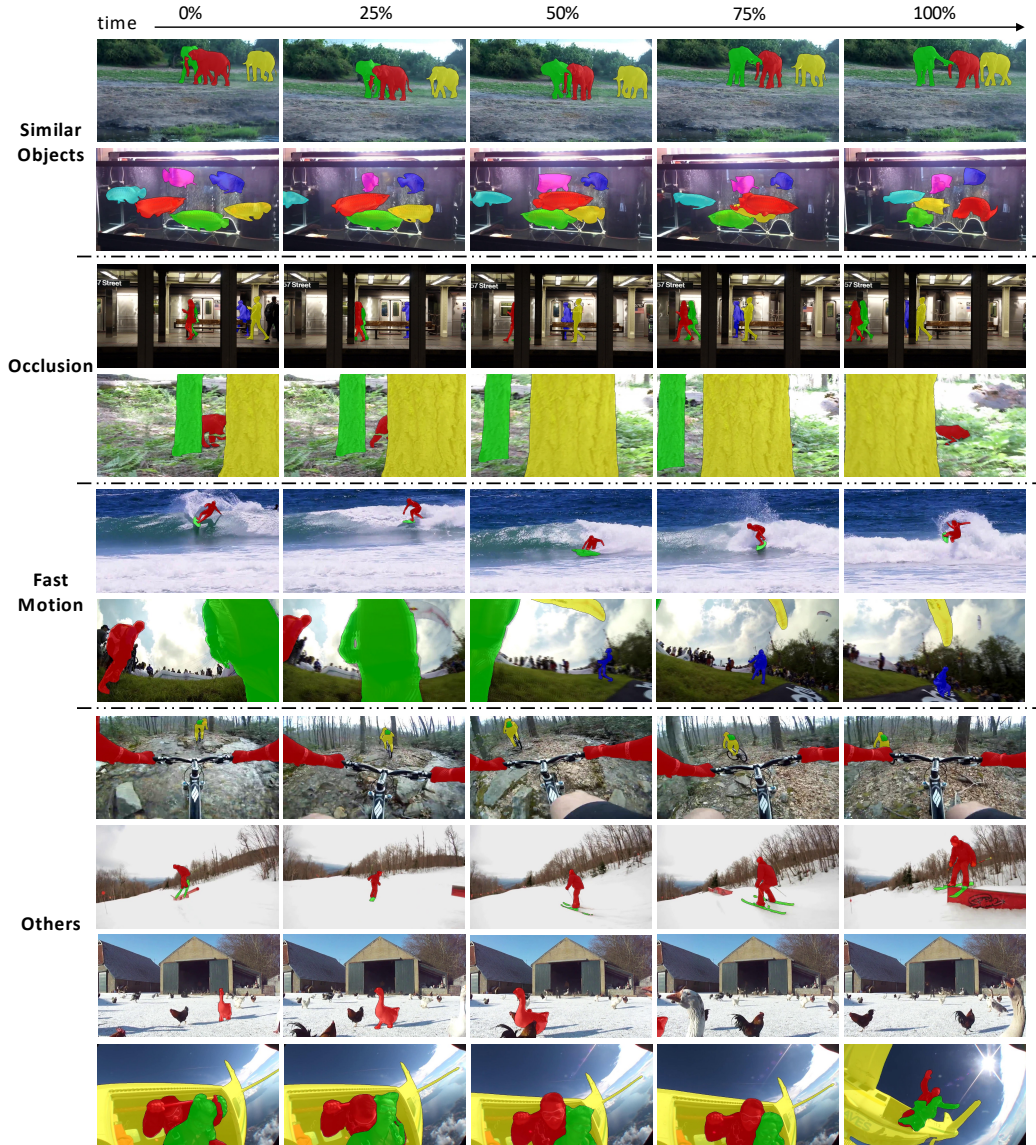

Figure 1: Qualitative results on YouTube-VOS [25] and DAVIS[18]. R50-DeAOT-L tracks and segments objects well under many challenging scenarios, including similar objects, occlusion, fast motion, etc.

We also supply more qualitative results under challenging scenarios on YouTube-VOS [25] and DAVIS 2017 [18] in Fig. 1, respectively. As demonstrated, DeAOT is robust to many challenging VOS cases, including similar objects, occlusion, fast motion, motion blur, etc.

#### A.4 Border Impact and Limitations

The proposed DeAOT framework significantly improves VOS’s performance, robustness, and robustness. The DeAOT variants with real-time speeds may benefit the applications of VOS in real-time video systems, such as video conference, self-driving car, augmented reality, etc. Also, DeAOT may be used in video surveillance systems for short-term and precise object tracking, although this is not our target requirement to promote the development of the VOS community.

As to limitations, the scenarios with multiple similar objects and severe occlusions are still very challenging for DeAOT and other VOS solutions. Besides, there are rare studies about VOS of long-term videos containing thousands of frames since the VOS community has no high-quality

Table 1: Additional quantitative comparison on DAVIS 2016 [17].

| Methods          | $\mathcal{J}\&\mathcal{F}$ | $\mathcal{J}$ | $\mathcal{F}$ | FPS         |
|------------------|----------------------------|---------------|---------------|-------------|
| FEEL [22]        | 81.7                       | 81.1          | 82.2          | 2.2         |
| AG [8]           | 82.1                       | 82.2          | 82.0          | 14.3        |
| SAT [2]          | 83.1                       | 82.6          | 83.6          | 39          |
| STM [16]         | 89.3                       | 88.7          | 89.9          | 6.3         |
| CFBI [27]        | 89.4                       | 88.3          | 90.5          | 6.3         |
| CFBI+ [29]       | 89.9                       | 88.7          | 91.1          | 5.9         |
| KMN [19]         | 90.5                       | 89.5          | 91.5          | 8.3         |
| RPCM [26]        | 90.6                       | 87.1          | 94.0          | 5.8         |
| HMMN [20]        | 90.8                       | 89.6          | 92.0          | 10.0        |
| STCN [3]         | 91.6                       | 90.8          | 92.5          | 27.2*       |
| AOT-T [28]       | 86.8                       | 86.1          | 87.4          | 51.4        |
| DeAOT-T          | <b>88.9</b>                | <b>87.8</b>   | <b>89.9</b>   | <b>63.5</b> |
| AOT-S [28]       | <b>89.4</b>                | <b>88.6</b>   | 90.2          | 40.0        |
| DeAOT-S          | 89.3                       | 87.6          | <b>90.9</b>   | <b>49.2</b> |
| AOT-B [28]       | 89.9                       | 88.7          | 91.1          | 29.6        |
| DeAOT-B          | <b>91.0</b>                | <b>89.4</b>   | <b>92.5</b>   | <b>40.9</b> |
| AOT-L [28]       | 90.4                       | 89.6          | 91.1          | 18.7        |
| DeAOT-L          | <b>92.0</b>                | <b>90.3</b>   | <b>93.7</b>   | <b>28.5</b> |
| R50-AOT-L [28]   | 91.1                       | 90.1          | 92.1          | 18.0        |
| R50-DeAOT-L      | <b>92.3</b>                | <b>90.5</b>   | <b>94.0</b>   | <b>27.0</b> |
| SwinB-AOT-L [28] | 92.0                       | 90.7          | 93.3          | 12.1        |
| SwinB-DeAOT-L    | <b>92.9</b>                | <b>91.1</b>   | <b>94.7</b>   | <b>15.4</b> |

dataset for long-term video segmentation. However, applications (*e.g.*, augmented reality) in the real world often require the algorithms to have the ability to process long videos smoothly.

## References

- [1] Bhat, G., Lawin, F.J., Danelljan, M., Robinson, A., Felsberg, M., Van Gool, L., Timofte, R.: Learning what to learn for video object segmentation. In: ECCV (2020)
- [2] Chen, X., Li, Z., Yuan, Y., Yu, G., Shen, J., Qi, D.: State-aware tracker for real-time video object segmentation. In: CVPR. pp. 9384–9393 (2020)
- [3] Cheng, H.K., Tai, Y.W., Tang, C.K.: Rethinking space-time networks with improved memory coverage for efficient video object segmentation. In: NeurIPS (2021)
- [4] Cheng, M.M., Mitra, N.J., Huang, X., Torr, P.H., Hu, S.M.: Global contrast based salient region detection. TPAMI **37**(3), 569–582 (2014)
- [5] Duke, B., Ahmed, A., Wolf, C., Aarabi, P., Taylor, G.W.: Sstvos: Sparse spatiotemporal transformers for video object segmentation. In: CVPR (2021)
- [6] Everingham, M., Van Gool, L., Williams, C.K., Winn, J., Zisserman, A.: The pascal visual object classes (voc) challenge. IJCV **88**(2), 303–338 (2010)
- [7] Hariharan, B., Arbeláez, P., Bourdev, L., Maji, S., Malik, J.: Semantic contours from inverse detectors. In: ICCV. pp. 991–998. IEEE (2011)
- [8] Johnander, J., Danelljan, M., Brissman, E., Khan, F.S., Felsberg, M.: A generative appearance model for end-to-end video object segmentation. In: CVPR. pp. 8953–8962 (2019)
- [9] Kristan, M., Leonardis, A., Matas, J., Felsberg, M., Pflugfelder, R., Kämäräinen, J.K., Danelljan, M., Zajc, L.Č., Lukežič, A., Drbohlav, O., et al.: The eighth visual object tracking vot2020 challenge results. In: ECCV. pp. 547–601. Springer (2020)
- [10] Li, Y., Shen, Z., Shan, Y.: Fast video object segmentation using the global context module. In: ECCV. pp. 735–750. Springer (2020)
- [11] Lin, T.Y., Maire, M., Belongie, S., Hays, J., Perona, P., Ramanan, D., Dollár, P., Zitnick, C.L.: Microsoft coco: Common objects in context. In: ECCV. pp. 740–755. Springer (2014)

- [12] Loshchilov, I., Hutter, F.: Decoupled weight decay regularization. In: ICLR (2019)
- [13] Lu, X., Wang, W., Danelljan, M., Zhou, T., Shen, J., Van Gool, L.: Video object segmentation with episodic graph memory networks. In: ECCV (2020)
- [14] Luiten, J., Voigtlaender, P., Leibe, B.: Premvos: Proposal-generation, refinement and merging for video object segmentation. In: ACCV. pp. 565–580 (2018)
- [15] Nowozin, S.: Optimal decisions from probabilistic models: the intersection-over-union case. In: CVPR. pp. 548–555 (2014)
- [16] Oh, S.W., Lee, J.Y., Xu, N., Kim, S.J.: Video object segmentation using space-time memory networks. In: ICCV (2019)
- [17] Perazzi, F., Pont-Tuset, J., McWilliams, B., Van Gool, L., Gross, M., Sorkine-Hornung, A.: A benchmark dataset and evaluation methodology for video object segmentation. In: CVPR. pp. 724–732 (2016)
- [18] Pont-Tuset, J., Perazzi, F., Caelles, S., Arbeláez, P., Sorkine-Hornung, A., Van Gool, L.: The 2017 davis challenge on video object segmentation. arXiv preprint arXiv:1704.00675 (2017)
- [19] Seong, H., Hyun, J., Kim, E.: Kernelized memory network for video object segmentation. In: ECCV (2020)
- [20] Seong, H., Oh, S.W., Lee, J.Y., Lee, S., Lee, S., Kim, E.: Hierarchical memory matching network for video object segmentation. In: Proceedings of the IEEE/CVF International Conference on Computer Vision. pp. 12889–12898 (2021)
- [21] Shi, J., Yan, Q., Xu, L., Jia, J.: Hierarchical image saliency detection on extended cssd. TPAMI **38**(4), 717–729 (2015)
- [22] Voigtlaender, P., Chai, Y., Schroff, F., Adam, H., Leibe, B., Chen, L.C.: Feelvos: Fast end-to-end embedding learning for video object segmentation. In: CVPR. pp. 9481–9490 (2019)
- [23] Voigtlaender, P., Luiten, J., Leibe, B.: Boltvos: Box-level tracking for video object segmentation. arXiv preprint arXiv:1904.04552 (2019)
- [24] Wug Oh, S., Lee, J.Y., Sunkavalli, K., Joo Kim, S.: Fast video object segmentation by reference-guided mask propagation. In: CVPR. pp. 7376–7385 (2018)
- [25] Xu, N., Yang, L., Fan, Y., Yue, D., Liang, Y., Yang, J., Huang, T.: Youtube-vos: A large-scale video object segmentation benchmark. arXiv preprint arXiv:1809.03327 (2018)
- [26] Xu, X., Wang, J., Li, X., Lu, Y.: Reliable propagation-correction modulation for video object segmentation. In: AAAI (2022)
- [27] Yang, Z., Wei, Y., Yang, Y.: Collaborative video object segmentation by foreground-background integration. In: ECCV (2020)
- [28] Yang, Z., Wei, Y., Yang, Y.: Associating objects with transformers for video object segmentation. In: NeurIPS (2021)
- [29] Yang, Z., Wei, Y., Yang, Y.: Collaborative video object segmentation by multi-scale foreground-background integration. TPAMI (2021)

Table 2: Additional quantitative comparison on multi-object benchmarks, YouTube-VOS [25] and DAVIS 2017 [18]. \*: using 600p instead of 480p videos in inference. ‡: timing extrapolated from single-object speed assuming linear scaling in the number of objects. \*: recorded on our device.

| (a) YouTube-VOS                 |                            |               |               |               |               |             | (b) DAVIS 2017               |                            |               |               |                   |
|---------------------------------|----------------------------|---------------|---------------|---------------|---------------|-------------|------------------------------|----------------------------|---------------|---------------|-------------------|
| Methods                         | Seen                       |               |               | Unseen        |               |             | Methods                      | $\mathcal{J}\&\mathcal{F}$ | $\mathcal{J}$ | $\mathcal{F}$ | FPS               |
|                                 | $\mathcal{J}\&\mathcal{F}$ | $\mathcal{J}$ | $\mathcal{F}$ | $\mathcal{J}$ | $\mathcal{F}$ | FPS         |                              |                            |               |               |                   |
| <i>Validation 2018 Split</i>    |                            |               |               |               |               |             | <i>Validation 2017 Split</i> |                            |               |               |                   |
| SAT <sub>[CVPR20]</sub> [2]     | 63.6                       | 67.1          | 70.2          | 55.3          | 61.7          | -           | AG [8]                       | 70.0                       | 67.2          | 72.7          | 7.1 <sup>‡</sup>  |
| AG <sub>[CVPR19]</sub> [8]      | 66.1                       | 67.8          | -             | 60.8          | -             | -           | FEEL [22]                    | 71.5                       | 69.1          | 74.0          | 2.0               |
| PRem <sub>[ACCV18]</sub> [14]   | 66.9                       | 71.4          | 75.9          | 56.5          | 63.7          | 0.17        | SAT [2]                      | 72.3                       | 68.6          | 76.0          | 19.5 <sup>‡</sup> |
| BoLT <sub>[arXiv19]</sub> [23]  | 71.1                       | 71.6          | -             | 64.3          | -             | 0.74        | LWL [1]                      | 81.6                       | 79.1          | 84.1          | 2.5 <sup>‡</sup>  |
| GC <sub>[ECCV20]</sub> [10]     | 73.2                       | 72.6          | 75.6          | 68.9          | 75.7          | -           | STM [16]                     | 81.8                       | 79.2          | 84.3          | 3.1 <sup>‡</sup>  |
| STM <sub>[ICCV19]</sub> [16]    | 79.4                       | 79.7          | 84.2          | 72.8          | 80.9          | -           | CFBI [27]                    | 81.9                       | 79.3          | 84.5          | 5.9               |
| EGMN <sub>[ECCV20]</sub> [13]   | 80.2                       | 80.7          | 85.1          | 74.0          | 80.9          | -           | SST [5]                      | 82.5                       | 79.9          | 85.1          | -                 |
| KMN <sub>[ECCV20]</sub> [19]    | 81.4                       | 81.4          | 85.6          | 75.3          | 83.3          | -           | EGMN [13]                    | 82.8                       | 80.2          | 85.2          | 2.5 <sup>‡</sup>  |
| CFBI <sub>[ECCV20]</sub> [27]   | 81.4                       | 81.1          | 85.8          | 75.3          | 83.4          | 3.4         | KMN [19]                     | 76.0                       | 74.2          | 77.8          | 4.2 <sup>‡</sup>  |
| LWL <sub>[ECCV20]</sub> [1]     | 81.5                       | 80.4          | 84.9          | 76.4          | 84.4          | -           | KMN [19]                     | 82.8                       | 80.0          | 85.6          | 4.2 <sup>‡</sup>  |
| SST <sub>[CVPR21]</sub> [5]     | 81.7                       | 81.2          | -             | 76.0          | -             | -           | CFBI+ [29]                   | 82.9                       | 80.1          | 85.7          | 5.6               |
| CFBI+ <sub>[TPAMI21]</sub> [29] | 82.8                       | 81.8          | 86.6          | 77.1          | 85.6          | 4.0         | SST [5]                      | 82.5                       | 79.9          | 85.1          | -                 |
| HMMN <sub>[ICCV21]</sub> [20]   | 82.6                       | 82.1          | 87.0          | 76.8          | 84.6          | -           | KMN [19]                     | 82.8                       | 80.0          | 85.6          | 4.2 <sup>‡</sup>  |
| STCN <sub>[NeurIPS21]</sub> [3] | 83.0                       | 81.9          | 86.5          | 77.9          | 85.7          | 8.4*        | CFBI+ [29]                   | 82.9                       | 80.1          | 85.7          | 5.6               |
| RPCM <sub>[AAAI22]</sub> [26]   | 84.0                       | 83.1          | 87.7          | 78.5          | 86.7          | -           | RPCM [26]                    | 83.7                       | 81.3          | 86.0          | -                 |
| AOT-T [28]                      | 80.2                       | 80.1          | 84.5          | 74.0          | 82.2          | 41.0        | HMMN [20]                    | 84.7                       | 81.9          | 87.5          | 5.0 <sup>‡</sup>  |
| DeAOT-T                         | <b>82.0</b>                | <b>81.6</b>   | <b>86.3</b>   | <b>75.8</b>   | <b>84.2</b>   | <b>53.4</b> | STCN [3]                     | 85.4                       | 82.2          | 88.6          | 24.7*             |
| AOT-S [28]                      | 82.6                       | 82.0          | 86.7          | 76.6          | 85.0          | 27.1        | AOT-T [28]                   | 79.9                       | 77.4          | 82.3          | 51.4              |
| DeAOT-S                         | <b>84.0</b>                | <b>83.3</b>   | <b>88.3</b>   | <b>77.9</b>   | <b>86.6</b>   | <b>38.7</b> | DeAOT-T                      | <b>80.5</b>                | <b>77.7</b>   | <b>83.3</b>   | <b>63.5</b>       |
| AOT-B [28]                      | 83.5                       | 82.6          | 87.5          | 77.7          | 86.0          | 20.5        | AOT-S [28]                   | <b>81.3</b>                | <b>78.7</b>   | <b>83.9</b>   | 40.0              |
| DeAOT-B                         | <b>84.6</b>                | <b>83.9</b>   | <b>88.9</b>   | <b>78.5</b>   | <b>87.0</b>   | <b>30.4</b> | DeAOT-S                      | 80.8                       | 77.8          | 83.8          | <b>49.2</b>       |
| AOT-L [28]                      | 83.8                       | 82.9          | 87.9          | 77.7          | 86.5          | 16.0        | AOT-B [28]                   | <b>82.5</b>                | <b>79.7</b>   | <b>85.2</b>   | 29.6              |
| DeAOT-L                         | <b>84.8</b>                | <b>84.2</b>   | <b>89.4</b>   | <b>78.6</b>   | <b>87.0</b>   | <b>24.7</b> | DeAOT-B                      | 82.2                       | 79.2          | 85.1          | <b>40.9</b>       |
| R50-AOT-L [28]                  | 84.1                       | 83.7          | 88.5          | 78.1          | 86.1          | 14.9        | AOT-L [28]                   | 83.8                       | <b>81.1</b>   | 86.4          | 18.7              |
| R50-DeAOT-L                     | <b>86.0</b>                | <b>84.9</b>   | <b>89.9</b>   | <b>80.4</b>   | <b>88.7</b>   | <b>22.4</b> | DeAOT-L                      | <b>84.1</b>                | 81.0          | <b>87.1</b>   | <b>28.5</b>       |
| SwB-AOT-L [28]                  | 84.5                       | 84.3          | 89.3          | 77.9          | 86.4          | 9.3         | R50-AOT-L [28]               | 84.9                       | <b>82.3</b>   | 87.5          | 18.0              |
| SwB-DeAOT-L                     | <b>86.2</b>                | <b>85.6</b>   | <b>90.6</b>   | <b>80.0</b>   | <b>88.4</b>   | <b>11.9</b> | R50-DeAOT-L                  | <b>85.2</b>                | 82.2          | <b>88.2</b>   | <b>27.0</b>       |
|                                 |                            |               |               |               |               |             | SwB-AOT-L [28]               | 85.4                       | 82.4          | 88.4          | 12.1              |
|                                 |                            |               |               |               |               |             | SwB-DeAOT-L                  | <b>86.2</b>                | <b>83.1</b>   | <b>89.2</b>   | <b>15.4</b>       |
|                                 |                            |               |               |               |               |             |                              |                            |               |               |                   |
|                                 |                            |               |               |               |               |             | <i>Testing 2017 Split</i>    |                            |               |               |                   |
| CFBI <sub>[ECCV20]</sub> [27]   | 81.0                       | 80.6          | 85.1          | 75.2          | 83.0          | 3.4         | FEEL [22]                    | 57.8                       | 55.2          | 60.5          | 1.9               |
| SST <sub>[CVPR21]</sub> [5]     | 81.8                       | 80.9          | -             | 76.6          | -             | -           | STM* [16]                    | 72.2                       | 69.3          | 75.2          | -                 |
| HMMN <sub>[ICCV21]</sub> [20]   | 82.5                       | 81.7          | 86.1          | 77.3          | 85.0          | -           | CFBI [27]                    | 75.0                       | 71.4          | 78.7          | 5.3               |
| CFBI+ <sub>[TPAMI21]</sub> [29] | 82.6                       | 81.7          | 86.2          | 77.1          | 85.2          | 4.0         | CFBI* [27]                   | 76.6                       | 73.0          | 80.1          | 2.9               |
| STCN <sub>[NeurIPS21]</sub> [3] | 82.7                       | 81.1          | 85.4          | 78.2          | 85.9          | 8.4*        | STCN [3]                     | 76.1                       | 72.7          | 79.6          | 19.5*             |
| RPCM <sub>[AAAI22]</sub> [26]   | 83.9                       | 82.6          | 86.9          | 79.1          | 87.1          | -           | KMN* [19]                    | 77.2                       | 74.1          | 80.3          | -                 |
| AOT-T [28]                      | 79.7                       | 79.6          | 83.8          | 73.7          | 81.8          | 41.0        | CFBI+* [29]                  | 78.0                       | 74.4          | 81.6          | 3.4               |
| DeAOT-T                         | <b>82.0</b>                | <b>81.2</b>   | <b>85.6</b>   | <b>76.4</b>   | <b>84.7</b>   | <b>53.4</b> | HMMN [20]                    | 78.6                       | 74.7          | 82.5          | 3.4 <sup>‡</sup>  |
| AOT-S [28]                      | 82.2                       | 81.3          | 85.9          | 76.6          | 84.9          | 27.1        | RPCM [26]                    | 79.2                       | 75.8          | 82.6          | -                 |
| DeAOT-S                         | <b>83.8</b>                | <b>82.8</b>   | <b>87.5</b>   | <b>78.1</b>   | <b>86.8</b>   | <b>38.7</b> |                              |                            |               |               |                   |
| AOT-B [28]                      | 83.3                       | 82.4          | 87.1          | 77.8          | 86.0          | 20.5        | AOT-T [28]                   | 72.0                       | 68.3          | 75.7          | 51.4              |
| DeAOT-B                         | <b>84.6</b>                | <b>83.5</b>   | <b>88.3</b>   | <b>79.1</b>   | <b>87.5</b>   | <b>30.4</b> | DeAOT-T                      | <b>73.7</b>                | <b>70.0</b>   | <b>77.3</b>   | <b>63.5</b>       |
| AOT-L [28]                      | 83.7                       | 82.8          | 87.5          | 78.0          | <b>86.7</b>   | 16.0        | AOT-S [28]                   | 73.9                       | 70.3          | 77.5          | 40.0              |
| DeAOT-L                         | <b>84.7</b>                | <b>83.8</b>   | <b>88.8</b>   | <b>79.0</b>   | <b>87.2</b>   | <b>24.7</b> | DeAOT-S                      | <b>75.4</b>                | <b>71.9</b>   | <b>79.0</b>   | <b>49.2</b>       |
| R50-AOT-L [28]                  | 84.1                       | 83.5          | 88.1          | <b>78.4</b>   | 86.3          | 14.9        | AOT-B [28]                   | 75.5                       | 71.6          | 79.3          | 29.6              |
| R50-DeAOT-L                     | <b>85.9</b>                | <b>84.6</b>   | <b>89.4</b>   | <b>80.8</b>   | <b>88.9</b>   | <b>22.4</b> | DeAOT-B                      | <b>76.2</b>                | <b>72.5</b>   | <b>79.9</b>   | <b>40.9</b>       |
| SwB-AOT-L [28]                  | 84.5                       | 84.0          | 88.8          | 78.4          | 86.7          | 9.3         | AOT-L [28]                   | <b>78.3</b>                | <b>74.3</b>   | <b>82.3</b>   | 18.7              |
| SwB-DeAOT-L                     | <b>86.1</b>                | <b>85.3</b>   | <b>90.2</b>   | <b>80.4</b>   | <b>88.6</b>   | <b>11.9</b> | DeAOT-L                      | 77.9                       | 74.1          | 81.7          | <b>28.5</b>       |
|                                 |                            |               |               |               |               |             | R50-AOT-L [28]               | 79.6                       | 75.9          | 83.3          | 18.0              |
|                                 |                            |               |               |               |               |             | R50-DeAOT-L                  | <b>80.7</b>                | <b>76.9</b>   | <b>84.5</b>   | <b>27.0</b>       |
|                                 |                            |               |               |               |               |             | SwB-AOT-L [28]               | 81.2                       | 77.3          | 85.1          | 12.1              |
|                                 |                            |               |               |               |               |             | SwB-DeAOT-L                  | <b>82.8</b>                | <b>78.9</b>   | <b>86.7</b>   | <b>15.4</b>       |
